# Supplementary material
Source: PubMed Central journal article supplement (PMC9996217)
Supplement: djac229_supplementary_data.pdf [file djac229_supplementary_data.pdf]

## **SUPPLEMENTARY MATERIAL**

**Supplementary Table 1.** Food items constituting the food group components of the empirical dietary index for hyperinsulinemia (EDIH) score and empirical dietary inflammatory pattern (EDIP) score and the food frequency questionnaire serving sizes.

**Supplementary Table 2.** Histologic and clinical characteristics of the endometrial cancer cases identified in the Nurses' Health Studies ascertained (NHS 1984-2016; NHS II 1991-2017).

**Supplementary Table 3.** Hazard ratio (95% CI) of type 1 endometrial cancer according to quintiles of Empirical Dietary Inflammatory Pattern (EDIP) and Empirical Dietary Index for Hyperinsulinemia (EDIH) stratified by Nurses' Health Study (NHS) cohort.

**Supplementary Table 4.** Hazard ratio (95% CI) of endometrial cancer (n=1,565) according to quintiles of Empirical Dietary Inflammatory Pattern (EDIP)<sup>a</sup> and Empirical Dietary Index for Hyperinsulinemia (EDIH)<sup>a</sup> in the Nurses' Health Study I (NHS I) and Nurses' Health Study II (NHS II).

**Supplementary Table 5.** Hazard ratio (95% CI) of confirmed type I epithelial endometrial cancer (n=1,180) according to quintiles of Empirical Dietary Inflammatory Pattern (EDIP)<sup>a</sup> and Empirical Dietary Index for Hyperinsulinemia (EDIH)<sup>a</sup> in the Nurses' Health Study I (NHS I) and Nurses' Health Study II (NHS II).

**Supplementary Table 6.** Hazard ratio (95% CI) of endometrial cancer according to quintiles of cumulative Alternate Healthy Eating Index 2010 (AHEI-2010) in the Nurses' Health Study I (NHS I) and Nurses' Health Study II (NHS II).

**Supplementary Table 7.** Hazard ratio (95% CI) of endometrial cancer according to quintiles of Empirical Dietary Inflammatory Pattern (EDIP)<sup>a</sup> and Empirical Dietary Index for Hyperinsulinemia (EDIH)<sup>a</sup> stratified by body mass index (BMI) category (Pooled results of the Nurses' Health Study I and Nurses' Health Study II).

**Supplementary Table 1.** Food items constituting the food group components of the Empirical Dietary Index for Hyperinsulinemia (EDIH) score and Empirical Dietary Inflammatory Pattern (EDIP) score and the food frequency questionnaire serving sizes

| <b>Food group</b>            | <b>Dietary index</b> |      | <b>Food items and serving size</b>                                                                                                                                                                                                                                |
|------------------------------|----------------------|------|-------------------------------------------------------------------------------------------------------------------------------------------------------------------------------------------------------------------------------------------------------------------|
|                              |                      |      | <b>Food groups positively associated with plasma C-peptide (EDIH) or inflammatory biomarkers (EDIP)</b>                                                                                                                                                           |
| Processed meat               | EDIH                 | EDIP | 1 piece or 1 slice processed meats, 2 slices bacon, or 1 hot dog                                                                                                                                                                                                  |
| Red meat                     | EDIH                 | EDIP | 4–6 oz (113–170 g) beef, pork, or lamb, or 1 hamburger patty                                                                                                                                                                                                      |
| Organ meat                   | -                    | EDIP | 4 oz (113 g) beef, calf, or pork liver; 1 oz (28.3 g) chicken or turkey liver                                                                                                                                                                                     |
| Low-energy sugary beverages  | EDIH                 | EDIP | 1 glass, 1 bottle, or 1 can low-energy cola; other low-energy carbonated beverages                                                                                                                                                                                |
| High-energy sugary beverages | EDIH                 | EDIP | 1 glass, 1 bottle, or 1 can cola with sugar; other carbonated beverages with sugar; or fruit punch drinks                                                                                                                                                         |
| Margarine                    | EDIH                 | -    | 1 pat margarine,                                                                                                                                                                                                                                                  |
| Butter                       | EDIH                 | -    | 1 pat butter                                                                                                                                                                                                                                                      |
| French fries                 | EDIH                 | -    | 4-oz French fries                                                                                                                                                                                                                                                 |
| Non-dark fish                | EDIH                 | EDIP | 3–5 oz (70–117 g) canned tuna, shrimp, lobster, scallops, seafood other than dark fish                                                                                                                                                                            |
| Eggs                         | EDIH                 | -    | 1 egg                                                                                                                                                                                                                                                             |
| Low-fat dairy                | EDIH                 | -    | 8-oz glass skimmed or low-fat milk, 1/2 cup sherbet or ice milk, 1 cup yogurt                                                                                                                                                                                     |
| Cream soup                   | EDIH                 | -    | 1 cup chowder or cream soup                                                                                                                                                                                                                                       |
| Tomatoes                     | EDIH                 | EDIP | 1 fresh tomato, 1 small glass of tomato juice, or 1/2 cup (115 g) tomato sauce                                                                                                                                                                                    |
| Poultry                      | EDIH                 | -    | 4–6 oz chicken or turkey with or without skin                                                                                                                                                                                                                     |
| Refined grains               | -                    | EDIP | 1 slice white bread, 1 English muffin, 1 bagel or roll, 1 muffin or biscuit, 1 cup (250 g) white rice, 1 cup (140 g) pasta, or 1 serving of pancakes or waffles                                                                                                   |
| Other vegetables             | -                    | EDIP | 4-inch (10.2-cm) stick celery, 1/2 cup fresh or cooked or 1 can mushrooms, 1/2 green pepper, 1 ear or 1/2 cup (90 g) frozen or canned corn, 1/2 cup (75 g) mixed vegetables, 1 eggplant, 1/2 cup (90 g) zucchini, 1/2 cup (16 g) alfalfa sprouts, or 1/4 cucumber |
|                              |                      |      | <b>Food groups inversely associated with plasma C-peptide (EDIH) or inflammatory biomarker (EDIP)</b>                                                                                                                                                             |
| Green leafy vegetables       | EDIH                 | EDIP | 1/2 cup spinach, 1 serving of iceberg or head lettuce, or 1 serving of romaine or leaf lettuce                                                                                                                                                                    |
| Dark-yellow vegetables       | -                    | EDIP | 1/2 cup carrots, 1/2 cup yellow (winter) squash, or 1/2 cup (100 g) yams or sweet potatoes                                                                                                                                                                        |

|                |      |      |                                                                                                                                                                                                                                                                                                                                                        |
|----------------|------|------|--------------------------------------------------------------------------------------------------------------------------------------------------------------------------------------------------------------------------------------------------------------------------------------------------------------------------------------------------------|
| Beer           | -    | EDIP | 1 bottle, 1 glass, or 1 can of beer                                                                                                                                                                                                                                                                                                                    |
| Wine           | EDIH | EDIP | 4-oz (113-g) glass red or white wine                                                                                                                                                                                                                                                                                                                   |
| Tea            | -    | EDIP | 1 cup tea (not herbal)                                                                                                                                                                                                                                                                                                                                 |
| Coffee         | EDIH | EDIP | 1 cup coffee (regular or decaffeinated)                                                                                                                                                                                                                                                                                                                |
| High-fat dairy | EDIH | -    | 8-oz glass whole milk, cream, 1 tablespoon sour cream, 1/2 cup ice cream, 1 oz cream cheese, 1 oz or 1 slice other cheese                                                                                                                                                                                                                              |
| Whole fruit    | EDIH | -    | 1 oz or small pack raisins, 1/2 cup grapes, 1 avocado, 1 banana, 1/4 cantaloupe, 1 slice watermelon, 1 orange, 1 fresh apple or pear, 1/2 cup (112 g) canned grapefruit, 1/2 cup (100 g) strawberries or blueberries, 1 fresh or 1/2 cup (112 g) canned peaches, or 1 fresh or 1/2 cup (95 g) canned apricots or plums (1 oz = 28.3 g; 1/2 cup = 50 g) |
| Fruit juice    | -    | EDIP | 1 small glass apple juice or cider, orange juice, grapefruit juice, or other fruit juice                                                                                                                                                                                                                                                               |
| Pizza          | -    | EDIP | 2 slices pizza                                                                                                                                                                                                                                                                                                                                         |
| Snacks         | -    | EDIP | 1 small bag or 1 oz (28.3 g) popcorn, potato chips, corn chips; or 1 cracker                                                                                                                                                                                                                                                                           |

---

**Supplementary Table 2.** Histologic and clinical characteristics of the endometrial cancer cases identified in the Nurses' Health Studies (NHS 1984-2016; NHSII 1991-2017).

|                                                    | <b>NHS<br/>(n=880)</b> | <b>NHSII<br/>(n=685)</b> | <b>Total<br/>(n=1,565)</b> |
|----------------------------------------------------|------------------------|--------------------------|----------------------------|
| <b>Age at diagnosis</b>                            | 76.9 ± 8.9             | 58.1 ± 5.7               | 74.4 ± 10.6                |
| <b>Types of epithelial carcinoma</b>               |                        |                          |                            |
| - Endometrioid carcinoma - type I, %               | 695 (79.0)             | 485 (70.8)               | 1,180 (75.4)               |
| - Non-endometrioid carcinoma - type II, %          | 72 (8.2)               | 31 (4.5)                 | 103 (6.6)                  |
| - Missing subtype, %                               | 113 (12.8)             | 169 (24.7)               | 282 (18.0)                 |
| <b>Histological subtype</b>                        |                        |                          |                            |
| - Adenocarcinoma, endometrioid type, %             | 695 (79.0)             | 485 (70.8)               | 1,180 (75.4)               |
| - Serous cell carcinoma, %                         | 11 (1.3)               | 9 (1.3)                  | 20 (1.3)                   |
| - Clear cell carcinoma, %                          | 15 (1.7)               | 4 (0.6)                  | 19 (1.2)                   |
| - Squamous cell carcinoma, %                       | 2 (0.2)                | 0 (0)                    | 2 (0.1)                    |
| - Adenosquamous cell carcinoma (mucoepidermoid), % | 16 (1.8)               | 1 (0.2)                  | 17 (1.1)                   |
| - Endometrial carcinosarcoma, %                    | 2 (0.2)                | 5 (0.7)                  | 7 (0.4)                    |
| - Mixed carcinoma, %                               | 2 (0.2)                | 8 (1.2)                  | 10 (0.6)                   |
| - Undifferentiated, %                              | 2 (0.2)                | 0 (0)                    | 2 (0.1)                    |
| - Other carcinoma, %                               | 135 (15.3)             | 173 (25.3)               | 308 (19.7)                 |
| <b>Grade in endometrioid type</b>                  |                        |                          |                            |
| - Well differentiated, %                           | 366 (52.7)             | 308 (63.5)               | 674 (57.1)                 |
| - Moderately differentiated, %                     | 199 (28.6)             | 125 (25.8)               | 324 (27.5)                 |
| - Poorly differentiated, %                         | 116 (16.7)             | 47 (9.7)                 | 163 (13.8)                 |
| - Not specified, %                                 | 14 (2.0)               | 5 (1.0)                  | 19 (1.6)                   |
| <b>Invasiveness</b>                                |                        |                          |                            |

|                                                          |            |            |            |
|----------------------------------------------------------|------------|------------|------------|
| - Non-invasive carcinoma, %                              | 138 (15.7) | 104 (15.2) | 242 (15.5) |
| - Invasive carcinoma, %                                  | 495 (56.3) | 188 (27.5) | 683 (43.6) |
| - Invasiveness unknown, %                                | 247 (28.0) | 393 (57.4) | 640 (40.9) |
| <b>Stage at diagnosis</b>                                |            |            |            |
| - Pre-invasive (non-invasive) carcinoma; no myometrial   | 138 (15.7) | 104 (15.2) | 242 (15.5) |
| - Carcinoma confined to corpus uteri, %                  | 25 (2.8)   | 32 (4.7)   | 57 (3.6)   |
| - Invasive carcinoma confined to corpus uteri, %         | 389 (44.2) | 143 (20.9) | 532 (34.0) |
| - Carcinoma involves corpus and cervix, %                | 29 (3.3)   | 17 (2.5)   | 46 (2.9)   |
| - Carcinoma extends outside uterus, but not outside the  | 16 (1.8)   | 12 (1.8)   | 28 (1.8)   |
| - Carcinoma extends beyond the pelvis, %                 | 23 (2.6)   | 5 (0.7)    | 28 (1.8)   |
| - Any of the above plus positive lymph node involvement, | 38 (4.3)   | 11 (1.6)   | 49 (3.1)   |
| - Death or extension not known, %                        | 222 (25.2) | 361 (52.7) | 583 (37.3) |

---

Values are means  $\pm$  SD or percentages (%) and are standardized to the age distribution of the study population.

---

**Supplementary Table 3.** Hazard ratio (95% CI) of type 1 endometrial cancer according to quintiles of Empirical Dietary Inflammatory Pattern (EDIP) and Empirical Dietary Index for Hyperinsulinemia (EDIH) stratified by Nurses' Health Study (NHS) cohort.

|                        |                         | Quintiles of Dietary Pattern |                   |                   |                   |                   | P for trend       | Per 1-SD increase |
|------------------------|-------------------------|------------------------------|-------------------|-------------------|-------------------|-------------------|-------------------|-------------------|
|                        |                         | Q1                           | Q2                | Q3                | Q4                | Q5                |                   |                   |
| NHS I                  | <b>EDIP<sup>a</sup></b> |                              |                   |                   |                   |                   |                   |                   |
|                        | Age-adjusted            | 1 (ref)                      | 0.94 (0.74, 1.20) | 1.27 (1.01, 1.59) | 1.37 (1.10, 1.72) | 1.47 (1.18, 1.84) | <0.001            | 1.16 (1.08, 1.25) |
|                        | Multivariable adjusted  | 1 (ref)                      | 0.91 (0.71, 1.16) | 1.20 (0.96, 1.51) | 1.31 (1.05, 1.64) | 1.42 (1.13, 1.77) | <0.001            | 1.15 (1.07, 1.24) |
|                        | Multivariable + BMI     | 1 (ref)                      | 0.84 (0.66, 1.07) | 1.06 (0.84, 1.34) | 1.10 (0.88, 1.38) | 1.03 (0.81, 1.29) | 0.32              | 1.02 (0.94, 1.10) |
|                        | <b>EDIH<sup>a</sup></b> |                              |                   |                   |                   |                   |                   |                   |
|                        | Age-adjusted            | 1 (ref)                      | 1.8 (0.85, 1.36)  | 1.36 (1.09, 1.70) | 1.18 (0.94, 1.49) | 1.45 (1.16, 1.81) | 0.001             | 1.13 (1.05, 1.21) |
| Multivariable adjusted | 1 (ref)                 | 1.04 (0.82, 1.31)            | 1.33 (1.06, 1.67) | 1.16 (0.91, 1.47) | 1.44 (1.14, 1.81) | 0.001             | 1.14 (1.05, 1.23) |                   |
| Multivariable + BMI    | 1 (ref)                 | 0.94 (0.74, 1.20)            | 1.15 (0.91, 1.44) | 0.92 (0.72, 1.17) | 0.97 (0.76, 1.24) | 0.75              | 0.99 (0.91, 1.07) |                   |
| NHS II                 | <b>EDIP<sup>a</sup></b> |                              |                   |                   |                   |                   |                   |                   |
|                        | Age-adjusted            | 1 (ref)                      | 1.10 (0.85, 1.41) | 1.03 (0.80, 1.34) | 1.35 (1.06, 1.73) | 1.63 (1.28, 2.07) | <0.001            | 1.22 (1.12, 1.32) |
|                        | Multivariable adjusted  | 1 (ref)                      | 1.07 (0.83, 1.38) | 1.00 (0.77, 1.30) | 1.27 (0.99, 1.63) | 1.51 (1.19, 1.93) | <0.001            | 1.19 (1.10, 1.29) |
|                        | Mult-adj+ BMI           | 1 (ref)                      | 1.00 (0.78, 1.29) | 0.89 (0.68, 1.16) | 1.04 (0.81, 1.34) | 1.03 (0.80, 1.32) | 0.72              | 1.03 (0.95, 1.12) |
|                        | <b>EDIH<sup>a</sup></b> |                              |                   |                   |                   |                   |                   |                   |
|                        | Age-adjusted            | 1 (ref)                      | 1.08 (0.83, 1.40) | 1.30 (1.01, 1.67) | 1.32 (1.03, 1.70) | 1.74 (1.36, 2.21) | <0.001            | 1.22 (1.13, 1.32) |
| Multivariable adjusted | 1 (ref)                 | 1.09 (0.84, 1.41)            | 1.30 (1.01, 1.68) | 1.32 (1.02, 1.71) | 1.75 (1.36, 2.24) | <0.001            | 1.23 (1.13, 1.33) |                   |
| Multivariable + BMI    | 1 (ref)                 | 0.97 (0.74, 1.26)            | 1.07 (0.83, 1.38) | 0.97 (0.74, 1.25) | 1.05 (0.81, 1.36) | 0.73              | 1.02 (0.93, 1.11) |                   |

Cox model was stratified for age in months, cohort study and year of questionnaire return with further adjustment for smoking status (never, past, current smoking), family history of endometrial cancer (no, yes), age at menarche (<12, 12, 13, 14, >14 years), oral contraceptives (never, ever), parity (1, 2, >3 children), age at menopause (continuous), menopausal status (premenopausal, postmenopausal, dubious/missing), postmenopausal hormone use (never user, past user, current user—estrogen only for <5 years, current user—estrogen only for ≥5 years, current estrogen + progestin user for < 5 years, current estrogen + progestin user for ≥5 years, current user of other types), and physical activity (linear MET-hours/week). The Multivariable-adjusted + BMI models adjusted for all covariates in the multivariable-adjusted model and additionally for BMI (kg/m<sup>2</sup>, continuous). <sup>a</sup>Energy-adjusted dietary pattern.

**Supplementary Table 4.** Hazard ratio (95% CI) of endometrial cancer (n=1,565) according to quintiles of Empirical Dietary Inflammatory Pattern (EDIP)<sup>a</sup> and Empirical Dietary Index for Hyperinsulinemia (EDIH)<sup>a</sup> in the Nurses' Health Study I (NHS I) and Nurses' Health Study II (NHS II).

|                                                  | Quintiles of Empirical Hypothesis-oriented Dietary Indices |                   |                   |                   |                   | P for trend <sup>b</sup> | Per 1-SD increase |
|--------------------------------------------------|------------------------------------------------------------|-------------------|-------------------|-------------------|-------------------|--------------------------|-------------------|
|                                                  | Q1                                                         | Q2                | Q3                | Q4                | Q5                |                          |                   |
| <b>EDIP<sup>a</sup></b>                          |                                                            |                   |                   |                   |                   |                          |                   |
| Cases/person-years                               | 267/501249                                                 | 268/501349        | 308/501494        | 344/501814        | 378/502070        |                          |                   |
| Age-adjusted                                     | 1 (ref)                                                    | 1.05 (0.88, 1.24) | 1.22 (1.03, 1.43) | 1.40 (1.19, 1.64) | 1.56 (1.33, 1.83) | <0.001                   | 1.18 (1.12, 1.25) |
| Multivariable-adjusted                           | 1 (ref)                                                    | 1.01 (0.85, 1.20) | 1.16 (0.98, 1.37) | 1.33 (1.13, 1.57) | 1.49 (1.26, 1.74) | <0.001                   | 1.17 (1.11, 1.23) |
| Multivariable-adjusted + BMI                     | 1 (ref)                                                    | 0.95 (0.80, 1.12) | 1.03 (0.87, 1.22) | 1.11 (0.94, 1.30) | 1.05 (0.89, 1.24) | 0.23                     | 1.03 (0.97, 1.09) |
| Multivariable-adjusted + EDIH <sup>c</sup>       | 1 (ref)                                                    | 0.95 (0.79, 1.13) | 1.05 (0.88, 1.26) | 1.16 (0.97, 1.40) | 1.21 (0.98, 1.49) | 0.02                     | 1.08 (1.00, 1.17) |
| Multivariable-adjusted + EDIH <sup>c</sup> + BMI | 1 (ref)                                                    | 0.96 (0.81, 1.15) | 1.06 (0.89, 1.26) | 1.15 (0.95, 1.38) | 1.11 (0.90, 1.37) | 0.14                     | 1.05 (0.97, 1.14) |
| <b>EDIH<sup>a</sup></b>                          |                                                            |                   |                   |                   |                   |                          |                   |
| Cases/person-years                               | 263/501094                                                 | 282/501492        | 336/501472        | 311/501891        | 374/502028        |                          |                   |
| Age-adjusted                                     | 1 (ref)                                                    | 1.11 (0.93, 1.31) | 1.33 (1.13, 1.57) | 1.28 (1.09, 1.51) | 1.56 (1.33, 1.84) | <0.001                   | 1.17 (1.11, 1.23) |
| Multivariable-adjusted                           | 1 (ref)                                                    | 1.09 (0.92, 1.29) | 1.32 (1.12, 1.55) | 1.27 (1.08, 1.51) | 1.58 (1.34, 1.86) | <0.001                   | 1.18 (1.12, 1.24) |
| Multivariable-adjusted + BMI                     | 1 (ref)                                                    | 0.98 (0.83, 1.17) | 1.11 (0.94, 1.31) | 0.98 (0.82, 1.16) | 1.02 (0.86, 1.21) | 0.88                     | 1.00 (0.95, 1.06) |
| Multivariable-adjusted + EDIP <sup>c</sup>       | 1 (ref)                                                    | 1.03 (0.86, 1.23) | 1.21 (1.01, 1.45) | 1.13 (0.93, 1.37) | 1.33 (1.07, 1.65) | 0.007                    | 1.11 (1.03, 1.21) |
| Multivariable-adjusted + EDIP <sup>c</sup> + BMI | 1 (ref)                                                    | 0.96 (0.80, 1.14) | 1.07 (0.89, 1.28) | 0.93 (0.76, 1.12) | 0.94 (0.75, 1.17) | 0.51                     | 0.97 (0.89, 1.05) |

Cox model was stratified for age in months, cohort study and year of questionnaire return with further adjustment for smoking status (never, past, current smoking), family history of endometrial cancer (no, yes), age at menarche (<12, 12, 13, 14, >14 years), oral contraceptives (never, ever), parity (1, 2, >3 children), age at menopause (continuous), menopausal status (premenopausal, postmenopausal, dubious/missing), postmenopausal hormone use (never user, past user, current user—estrogen only for <5 years, current user—estrogen only for ≥5 years, current estrogen + progestin user for <5 years, current estrogen + progestin user for ≥5 years, current user of other types), and physical activity (linear MET-hours/week). Multivariable-adjusted model further adjusted for BMI (kg/m<sup>2</sup>, continuous). <sup>a</sup> Energy-adjusted dietary pattern; <sup>b</sup> P for trend was calculated using continuous variables of dietary pattern in the model; <sup>c</sup> Model further mutually adjusting for EDIH or EDIP.

**Supplementary Table 5.** Hazard ratio (95% CI) of confirmed type I epithelial endometrial cancer (n=1,180) according to quintiles of Empirical Dietary Inflammatory Pattern (EDIP)<sup>a</sup> and Empirical Dietary Index for Hyperinsulinemia (EDIH)<sup>a</sup> in the Nurses' Health Study I (NHS I) and Nurses' Health Study II (NHS II).

|                              | Quintiles of Empirical Hypothesis-oriented Dietary Indices |                   |                   |                   |                   | P for trend <sup>b</sup> | Per 1-SD increase |
|------------------------------|------------------------------------------------------------|-------------------|-------------------|-------------------|-------------------|--------------------------|-------------------|
|                              | Q1                                                         | Q2                | Q3                | Q4                | Q5                |                          |                   |
| <b>EDIP<sup>a</sup></b>      |                                                            |                   |                   |                   |                   |                          |                   |
| Cases/person-years           | 197/501249                                                 | 199/501349        | 233/501494        | 263/501814        | 288/502070        |                          |                   |
| Age-adjusted                 | 1 (ref)                                                    | 1.05 (0.86, 1.28) | 1.25 (1.03, 1.51) | 1.44 (1.20, 1.74) | 1.61 (1.34, 1.93) | <0.0001                  | 1.19 (1.12, 1.26) |
| Multivariable-adjusted       | 1 (ref)                                                    | 1.02 (0.83, 1.24) | 1.19 (0.98, 1.44) | 1.37 (1.14, 1.65) | 1.55 (1.28, 1.86) | <0.0001                  | 1.18 (1.11, 1.26) |
| Multivariable-adjusted + BMI | 1 (ref)                                                    | 0.95 (0.78, 1.16) | 1.06 (0.87, 1.28) | 1.14 (0.94, 1.37) | 1.09 (0.90, 1.32) | 0.14                     | 1.03 (0.97, 1.10) |
| <b>EDIH<sup>a</sup></b>      |                                                            |                   |                   |                   |                   |                          |                   |
| Cases/person-years           | 208/501094                                                 | 206/501492        | 257/501472        | 223/501891        | 286/502028        |                          |                   |
| Age-adjusted                 | 1 (ref)                                                    | 1.03 (0.85, 1.25) | 1.29 (1.08, 1.55) | 1.16 (0.96, 1.40) | 1.50 (1.25, 1.80) | <0.0001                  | 1.14 (1.08, 1.21) |
| Multivariable-adjusted       | 1 (ref)                                                    | 1.01 (0.83, 1.22) | 1.29 (1.07, 1.55) | 1.15 (0.95, 1.40) | 1.53 (1.27, 1.85) | <0.0001                  | 1.16 (1.09, 1.23) |
| Multivariable-adjusted + BMI | 1 (ref)                                                    | 0.91 (0.75, 1.10) | 1.08 (0.90, 1.30) | 0.89 (0.73, 1.08) | 0.98 (0.81, 1.19) | 0.81                     | 0.98 (0.92, 1.05) |

Cox model was stratified for age in months, cohort study and year of questionnaire return with further adjustment for smoking status (never, past, current smoking), family history of endometrial cancer (no, yes), age at menarche (<12, 12, 13, 14, >14 years), oral contraceptives (never, ever), parity (1, 2, >3 children), age at menopause (continuous), menopausal status (premenopausal, postmenopausal, dubious/missing), postmenopausal hormone use (never user, past user, current user—estrogen only for <5 years, current user – estrogen only for ≥5 years, current estrogen + progestin user for < 5 years, current estrogen + progestin user for ≥5 years, current user of other types), and physical activity (linear MET-hours/week). Multivariable-adjusted model further adjusted for BMI (kg/m<sup>2</sup>, continuous).<sup>a</sup> Energy-adjusted dietary pattern; <sup>b</sup> P for trend was calculated using continuous variables of dietary pattern in the model.



**Supplementary Table 6.** Hazard ratio (95% CI) of endometrial cancer according to quintiles of cumulative Alternate Healthy Eating Index 2010 (AHEI-2010) in the Nurses' Health Study I (NHS I) and Nurses' Health Study II (NHS II).

| AHEI-2010                           | Quintiles of dietary pattern |                   |                   |                   |                   | P for trend <sup>1</sup> |
|-------------------------------------|------------------------------|-------------------|-------------------|-------------------|-------------------|--------------------------|
|                                     | Q1                           | Q2                | Q3                | Q4                | Q5                |                          |
| <b>All endometrial cancer cases</b> |                              |                   |                   |                   |                   |                          |
| Cases/person-years                  | 310/510558                   | 330/510241        | 305/509864        | 329/509280        | 304/509168        |                          |
| Age-adjusted                        | 1.00                         | 1.04 (0.89, 1.21) | 0.91 (0.78, 1.07) | 0.96 (0.82, 1.12) | 0.85 (0.72, 1.00) | 0.02                     |
| Multivariable-adjusted              | 1.00                         | 1.03 (0.88, 1.20) | 0.90 (0.76, 1.05) | 0.94 (0.80, 1.10) | 0.82 (0.70, 0.98) | 0.01                     |
| Multivariable-adjusted + BMI        | 1.00                         | 1.06 (0.91, 1.24) | 0.95 (0.81, 1.12) | 1.03 (0.88, 1.21) | 0.98 (0.83, 1.16) | 0.72                     |
| <b>Type 1 endometrial cancer</b>    |                              |                   |                   |                   |                   |                          |
| Cases/person-years                  | 299/510558                   | 303/510241        | 286/509864        | 307/509280        | 280/509168        |                          |
| Age-adjusted                        | 1.00                         | 0.99 (0.84, 1.16) | 0.89 (0.75, 1.04) | 0.93 (0.79, 1.09) | 0.81 (0.69, 0.96) | 0.008                    |
| Multivariable-adjusted              | 1.00                         | 0.98 (0.84, 1.15) | 0.88 (0.74, 1.04) | 0.91 (0.77, 1.07) | 0.80 (0.67, 0.94) | 0.005                    |
| Multivariable-adjusted + BMI        | 1.00                         | 1.02 (0.86, 1.19) | 0.93 (0.79, 1.10) | 1.01 (0.85, 1.19) | 0.95 (0.79, 1.12) | 0.52                     |

Cox model was stratified for age in months, cohort study and year of questionnaire return with further adjustment for smoking status (never, past, current smoking), family history of endometrial cancer (no, yes), age at menarche (<12, 12, 13, 14, >14 years), oral contraceptives (never, ever), parity (1, 2, >3 children), age at menopause (continuous), menopausal status (premenopausal, postmenopausal, dubious/missing), postmenopausal hormone use (never user, past user, current user– estrogen only for <5 years, current user – estrogen only for ≥5 years, current estrogen + progestin user for < 5 years, current estrogen + progestin user for ≥5 years, current user of other types), and physical activity (linear MET-hours/week). Multivariable-adjusted model further adjusted for BMI (kg/m<sup>2</sup>, continuous).<sup>1</sup> P for trend was calculated using continuous variables of dietary pattern in the model.

**Supplementary Table 7.** Hazard ratio (95% CI) of endometrial cancer according to quintiles of Empirical Dietary Inflammatory Pattern (EDIP)<sup>a</sup> and Empirical Dietary Index for Hyperinsulinemia (EDIH)<sup>a</sup> stratified by body mass index (BMI) category (Pooled results of the Nurses' Health Study I and Nurses' Health Study II).

|                                    |                           | Quintiles of Dietary Pattern |                   |                   |                   |                   | P for trend | P for interaction <sup>b</sup> |
|------------------------------------|---------------------------|------------------------------|-------------------|-------------------|-------------------|-------------------|-------------|--------------------------------|
|                                    |                           | Q1                           | Q2                | Q3                | Q4                | Q5                |             |                                |
| Multivariable-adjusted model       | <b>EDIP<sup>a</sup></b>   |                              |                   |                   |                   |                   |             |                                |
|                                    | BMI                       |                              |                   |                   |                   |                   |             | 0.03                           |
|                                    | <25 kg/m <sup>2</sup>     | 1 (ref)                      | 0.97 (0.73, 1.28) | 1.06 (0.80, 1.41) | 1.04 (0.77, 1.39) | 1.00 (0.72, 1.40) | 0.83        |                                |
|                                    | ≥25-<27 kg/m <sup>2</sup> | 1 (ref)                      | 0.84 (0.54, 1.30) | 0.76 (0.48, 1.18) | 1.09 (0.71, 1.67) | 0.85 (0.54, 1.34) | 0.78        |                                |
|                                    | ≥27-<30 kg/m <sup>2</sup> | 1 (ref)                      | 1.35 (0.83, 2.19) | 1.17 (0.71, 1.91) | 1.57 (0.98, 2.52) | 2.01 (1.27, 3.18) | 0.002       |                                |
|                                    | ≥30-<35 kg/m <sup>2</sup> | 1 (ref)                      | 0.76 (0.50, 1.16) | 1.05 (0.71, 1.55) | 0.99 (0.67, 1.45) | 0.89 (0.61, 1.31) | 0.93        |                                |
|                                    | ≥35 kg/m <sup>2</sup>     | 1 (ref)                      | 1.04 (0.63, 1.71) | 1.21 (0.76, 1.92) | 1.44 (0.92, 1.25) | 1.32 (0.86, 2.01) | 0.09        |                                |
|                                    | <b>EDIH<sup>a</sup></b>   |                              |                   |                   |                   |                   |             |                                |
|                                    | BMI                       |                              |                   |                   |                   |                   |             | 0.04                           |
|                                    | <25 kg/m <sup>2</sup>     | 1 (ref)                      | 0.99 (0.76, 1.30) | 1.06 (0.80, 1.39) | 0.92 (0.67, 1.26) | 1.04 (0.73, 1.46) | 0.08        |                                |
| ≥25-<27 kg/m <sup>2</sup>          | 1 (ref)                   | 1.10 (0.71, 1.71)            | 0.94 (0.59, 1.48) | 1.25 (0.80, 1.95) | 0.84 (0.51, 1.38) | 0.11              |             |                                |
| ≥27-<30 kg/m <sup>2</sup>          | 1 (ref)                   | 1.45 (0.89, 2.38)            | 1.75 (1.08, 2.81) | 1.16 (0.70, 1.94) | 1.81 (1.12, 2.95) | 0.11              |             |                                |
| ≥30-<35 kg/m <sup>2</sup>          | 1 (ref)                   | 0.79 (0.51, 1.24)            | 1.02 (0.68, 1.53) | 0.91 (0.61, 1.35) | 0.91 (0.61, 1.36) | 0.09              |             |                                |
| ≥35 kg/m <sup>2</sup>              | 1 (ref)                   | 1.01 (0.59, 1.71)            | 1.33 (0.81, 2.18) | 1.02 (0.63, 1.66) | 1.15 (0.73, 1.82) | 0.62              |             |                                |
| Multivariable-adjusted model + BMI | <b>EDIP<sup>a</sup></b>   |                              |                   |                   |                   |                   |             |                                |
|                                    | BMI                       |                              |                   |                   |                   |                   |             | 0.44                           |
|                                    | <25 kg/m <sup>2</sup>     | 1 (ref)                      | 0.96 (0.73, 1.30) | 1.05 (0.79, 1.39) | 1.03 (0.76, 1.38) | 0.99 (0.71, 1.38) | 0.89        |                                |
|                                    | ≥25-<27 kg/m <sup>2</sup> | 1 (ref)                      | 0.82 (0.53, 1.27) | 0.75 (0.48, 1.17) | 1.09 (0.71, 1.67) | 0.86 (0.54, 1.35) | 0.82        |                                |
|                                    | ≥27-<30 kg/m <sup>2</sup> | 1 (ref)                      | 1.34 (0.83, 2.18) | 1.16 (0.71, 1.91) | 1.55 (0.97, 2.49) | 1.99 (1.25, 3.15) | 0.80        |                                |
|                                    | ≥30-<35 kg/m <sup>2</sup> | 1 (ref)                      | 0.75 (0.49, 1.15) | 1.04 (0.70, 1.53) | 0.98 (0.66, 1.43) | 0.88 (0.60, 1.29) | 0.86        |                                |
|                                    | ≥35 kg/m <sup>2</sup>     | 1 (ref)                      | 1.08 (0.65, 1.80) | 1.22 (0.77, 1.95) | 1.40 (0.90, 2.20) | 1.21 (0.78, 1.85) | 0.38        |                                |
|                                    | <b>EDIH<sup>a</sup></b>   |                              |                   |                   |                   |                   |             |                                |
|                                    | BMI                       |                              |                   |                   |                   |                   |             | 0.66                           |
|                                    | <25 kg/m <sup>2</sup>     | 1 (ref)                      | 0.98 (0.75, 1.29) | 1.04 (0.79, 1.37) | 0.91 (0.66, 1.24) | 1.02 (0.72, 1.43) | 0.87        |                                |
| ≥25-<27 kg/m <sup>2</sup>          | 1 (ref)                   | 1.08 (0.70, 1.68)            | 0.92 (0.58, 1.45) | 1.26 (0.81, 1.96) | 0.84 (0.51, 1.39) | 0.77              |             |                                |
| ≥27-<30 kg/m <sup>2</sup>          | 1 (ref)                   | 1.46 (0.89, 2.39)            | 1.73 (1.07, 2.78) | 1.14 (0.69, 1.90) | 1.77 (1.09, 2.87) | 0.08              |             |                                |
| ≥30-<35 kg/m <sup>2</sup>          | 1 (ref)                   | 0.78 (0.50, 1.22)            | 1.00 (0.67, 1.50) | 0.89 (0.60, 1.33) | 0.89 (0.60, 1.33) | 0.80              |             |                                |
| ≥35 kg/m <sup>2</sup>              | 1 (ref)                   | 1.01 (0.59, 1.72)            | 1.30 (0.79, 2.14) | 0.98 (0.60, 1.59) | 1.02 (0.64, 1.63) | 0.74              |             |                                |

---

Cox model was stratified for age in months, and year of questionnaire return with further adjustment for smoking status (never, past, current smoking), family history of endometrial cancer (no, yes), age at menarche (<12, 12, 13, 14, >14 years), oral contraceptives (never, ever), parity (1, 2, >3 children), age at menopause (continuous), menopausal status (premenopausal, postmenopausal, dubious/missing), postmenopausal hormone use (never user, past user, current user– estrogen only for <5 years, current user – estrogen only for  $\geq$ 5 years, current estrogen + progestin user for < 5 years, current estrogen + progestin user for  $\geq$ 5 years, current user of other types), and physical activity (linear MET-hours/week). Multivariable-adjusted model further adjusted for BMI (kg/m<sup>2</sup>, continuous).

<sup>a</sup> Energy-adjusted dietary pattern.

<sup>b</sup> P for interaction was calculated using the Wald test by including the interaction term.
